# Supplementary material
Source: PubMed Central journal article supplement (PMC2908470)
Supplement: ddq227_1.pdf [file ddq227_1.pdf]

## SUPPLEMENTAL DATA - Tertiary Screen of 38 Compounds

| compounds              | % survival<br>at 10 $\mu$ M | MTDcc<br>( $\mu$ M) | % suppression of<br>GFAP promoter | supplier |
|------------------------|-----------------------------|---------------------|-----------------------------------|----------|
| diaziquone             | 80                          | >20                 | 86                                | SA       |
| clomipramine           | 83                          | 12.5                | 66                                | SA       |
| chrysophanol           | 86                          | 12.5                | 66                                | SA       |
| amitriptyline          | 102                         | > 20                | 63                                | SA       |
| chlorprothixene        | 79                          | 17.5                | 60                                | SA       |
| EGCDG                  | 84                          | 17.5                | 57                                | MS       |
| tamoxifen citrate      | 60                          | 7.5                 | 52                                | SA       |
| mundoserone            | 88                          | >20                 | 50                                | MS       |
| amlodipine             | 98                          | 12.5                | 44                                | SA       |
| embelin                | 63                          | 7.5                 | 37                                | SA       |
| thioridazine           | 32                          | 5                   | 37                                | SA       |
| ritanserlin            | 88                          | 12.5                | 29                                | SA       |
| irigenol               | 71                          | >20                 | 28                                | MS       |
| fluocinonide           | 101                         | >20                 | 28                                | IBS      |
| hexetidine             | 108                         | >20                 | 26                                | SA       |
| estradiol benzoate     | 78                          | >20                 | 26                                | CC       |
| ketotifen              | 108                         | >20                 | 25                                | SA       |
| clobetasol propionate  | 103                         | >20                 | 25                                | SA       |
| colecalfiferol         | 80                          | >20                 | 24                                | SA       |
| fluphenazine           | 65                          | 7.5                 | 23                                | SA       |
| pyrogallin             | 75                          | >20                 | 22                                | MS       |
| kanamycin              | 138                         | >20                 | 22                                | SA       |
| azinthos methyl        | 105                         | >20                 | 18                                | SA       |
| acetaminosalol         | 96                          | >20                 | 17                                | MS       |
| oxotremorine           | 116                         | >20                 | 16                                | SA       |
| ritodrine              | 120                         | >20                 | 16                                | SA       |
| NPPB                   | 107                         | >20                 | 16                                | SA       |
| chloramphenicol        | 106                         | >20                 | 16                                | SA       |
| terfenadine            | 16                          | 2.5                 | 14                                | SA       |
| phosphocreatine        | 86                          | >20                 | 13                                | SA       |
| betulinic acid         | 102                         | >20                 | 13                                | SA       |
| methylnorlichexanthone | 95                          | >20                 | 10                                | MS       |
| coumophos              | 92                          | >20                 | 10                                | MS       |
| swietenolide-3-acetate | 95                          | >20                 | 8                                 | MS       |
| dacarbazine            | 87                          | >20                 | 7                                 | SA       |
| veratric acid          | 85                          | >20                 | 6                                 | SA       |
| pantothenic acid       | 75                          | >20                 | 6                                 | SA       |
| neamine                | 73                          | >20                 | 5                                 | SA       |

**Table 2.** Thirty-eight compounds analyzed in tertiary screen, sorted by degree of suppression of GFAP promoter. A dose-response association was evaluated after exposure to each compound at various concentrations (0.1, 0.5, 1, 5, 10, 15, 20  $\mu$ M) for 48 hrs. The “maximum tolerable dose” (MTDcc) indicates the highest concentration that reduced cell viability < 30%. Each compound and concentration was analyzed in quadruplicate wells. EGCDG: epigallocatechin 3,5-digallate. *Supplier abbreviations are as follows: SA (Sigma Aldrich), MS (Microsource Spectrum), IBS (Interbioscreen, Inc.), CC (Cayman Chemical).*
